# Supplementary material
Source: HighWire-hosted journal article supplement (https://bmjopenrespres.bmj.com/content/10/1/e001670)
Supplement: inline-supplementary-material-1 [file inline-supplementary-material-1.pdf]

## BISOPROLOL VERSUS CELIPROLOL ON DYNAMIC HYPERINFLATION, CARDIOPULMONARY EXERCISE AND DOMICILIARY SAFETY IN COPD: A SINGLE CENTRE, RANDOMISED, CROSSOVER STUDY

### Authors

William J Anderson, Philip M Short, Rose A Ross, Brian J Lipworth

### Supplemental Figure

#### Safety Algorithm for Beta-blocker Dose Titration.

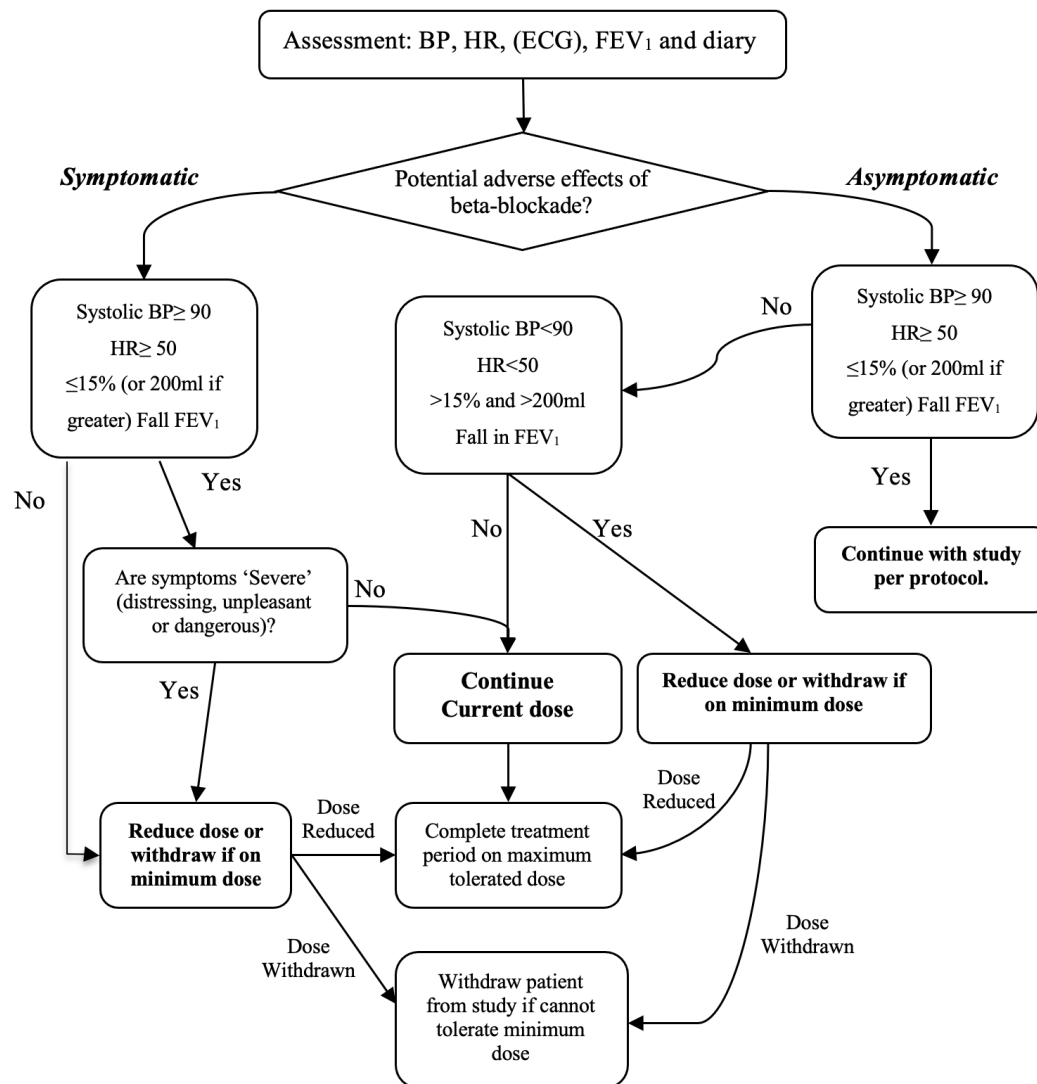

Abbreviations: BP, blood pressure. HR, heart rate. ECG, electrocardiogram. FEV<sub>1</sub>, forced expiratory volume in 1 second. Diary, daily diurnal diary of symptom scores and reliever use. Dose, dose of study beta-blocker.
